# Supplementary figures and images for: Temporal Trends in Treatment and Outcomes of Endometrial Carcinoma in the United States, 2005–2020
Source: MDPI journal article supplement (doi:10.3390/cancers16071282), 2024-03-26

## Supplemental Material

**Figure S1:** Trends in the sequencing of systemic therapy (2006–2020).

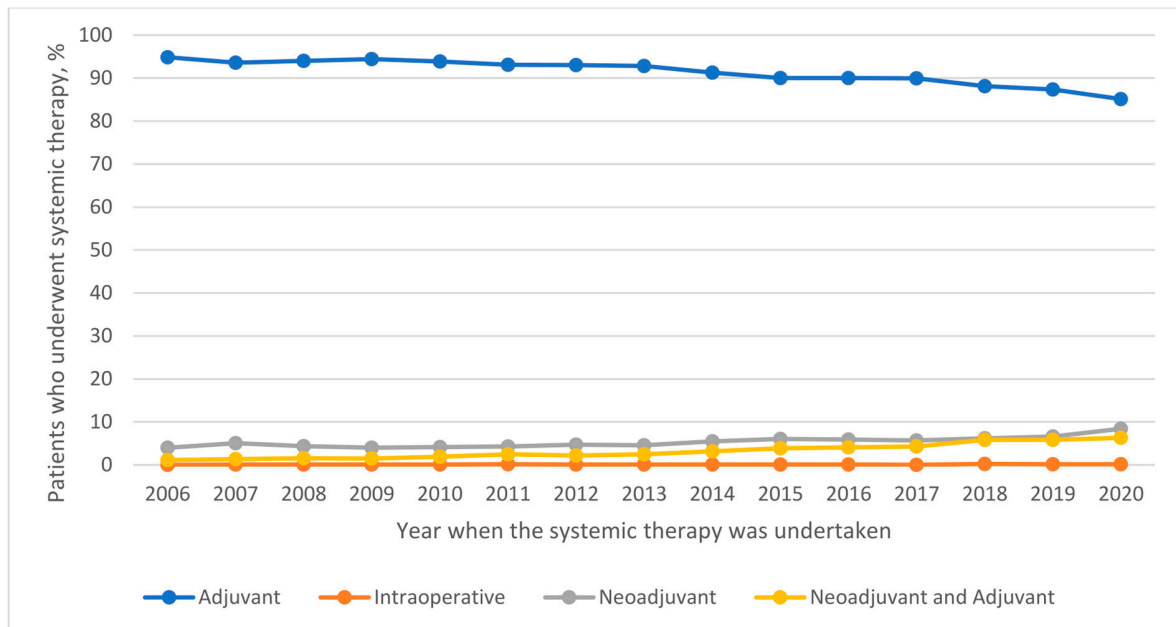

Supplement: s1 [file s1]
